# Supplementary material
Source: Research Square preprint supplement (doi:10.21203/rs.3.rs-9303146/v1)
Supplement: Supplementary file 1 [file 6727b91081f907d19d84baf6.docx]

**Preoperative CT Habitat Analysis for Predicting WHO/ISUP Grade in Clear Cell Renal Cell Carcinoma: A Multicenter Study**

**Supplementary Material 1. The CT image acquisition parameters in difference institution.**

| **Parameter** | **SYUCC** | **GZFPH** |
| --- | --- | --- |
| CT system | Multiple vendors | Multiple vendors |
| Tube voltage | 120 kVp | 120–140 kVp |
| Tube current | Automated modulation | Automated modulation |
| Contrast agent | Iopromide (300–350 mg/mL) | Nonionic contrast |
| Dosage | 1–1.5 mL/kg | 1 mL/kg |
| Injection rate | 2.5–3.5 mL/s | 2.5–3.5 mL/s |
| Phases | UP/CMP/NP/EP | UP/CMP/NP/EP |
| Slice thickness | 1–5 mm | 1–5 mm |
| Matrix | 512×512 | 512×512 |

**Supplementary Material 2. Selected radiomics and habitat features for WHO/ISUP grade prediction.**

| **Feature set** | **Selected features** |
| --- | --- |
| **Radiomics model** | 1. log-sigma-5-0-mm-3D_gldm_GrayLevelNonUniformity 2. wavelet-LHH_glcm_ClusterTendency 3. original_glszm_GrayLevelVariance 4. wavelet-LHL_glcm_Idn 5. log-sigma-3-0-mm-3D_ngtdm_Complexity 6. wavelet-HHL_firstorder_RobustMeanAbsoluteDeviation 7. wavelet-LHL_firstorder_Skewness 8. log-sigma-3-0-mm-3D_firstorder_Entropy 9. wavelet-LHH_glrlm_RunPercentage 10. wavelet-LHL_firstorder_Mean 11. wavelet-LHH_glrlm_RunVariance 12. log-sigma-1-0-mm-3D_firstorder_Median 13. wavelet-HLL_glcm_SumAverage 14. wavelet-LLL_glrlm_RunEntropy 15. log-sigma-1-0-mm-3D_gldm_LargeDependenceLowGrayLevelEmphasis 16. wavelet-HHL_glcm_Idn 17. wavelet-HHL_glrlm_LongRunEmphasis 18. wavelet-HLH_glcm_Contrast 19. wavelet-HLH_glcm_JointAverage 20. log-sigma-3-0-mm-3D_glcm_Idmn |
| **Habitat model** | 1. S1_wavelet-HLL_ngtdm_Busyness 2. S2_log-sigma-5-0-mm-3D_glszm_GrayLevelNonUniformityNormalized 3. S3_wavelet-HLH_firstorder_Range 4. S3_wavelet-HHH_firstorder_Skewness 5. S3_wavelet-HHL_firstorder_90Percentile 6. S2_wavelet-HLL_glrlm_ShortRunHighGrayLevelEmphasis 7. S3_wavelet-LHH_glszm_LargeAreaLowGrayLevelEmphasis 8. S3_original_gldm_HighGrayLevelEmphasis 9. S3_wavelet-HLH_glrlm_RunLengthNonUniformity 10. S3_wavelet-HHH_firstorder_InterquartileRange 11. S1_wavelet-LHL_firstorder_Skewness 12. S1_wavelet-LLH_glszm_GrayLevelNonUniformity 13. S2_log-sigma-5-0-mm-3D_firstorder_Uniformity 14. S2_wavelet-LHH_firstorder_10Percentile 15. S3_original_gldm_HighGrayLevelEmphasis 16. S3_wavelet-HLL_gldm_GrayLevelNonUniformity 17. S3_wavelet-HHL_glrlm_ShortRunLowGrayLevelEmphasis 18. S3_log-sigma-5-0-mm-3D_glszm_SmallAreaHighGrayLevelEmphasis 19. S3_original_firstorder_MeanAbsoluteDeviation 20. S3_original_firstorder_InterquartileRange |
